# Supplementary material for: Effects of Essential Oil Citral on the Growth, Mycotoxin Biosynthesis and Transcriptomic Profile of Alternaria alternata
Source: MDPI journal article supplement (doi:10.3390/toxins11100553), 2019-09-20
Supplement: s1 [file s1]

# Supplementary Materials: Effects of Essential Oil Citral on the Growth, Mycotoxin Biosynthesis and Transcriptomic Profile of *Alternaria alternata*

Liuqing Wang, Nan Jiang, Duo Wang and Meng Wang

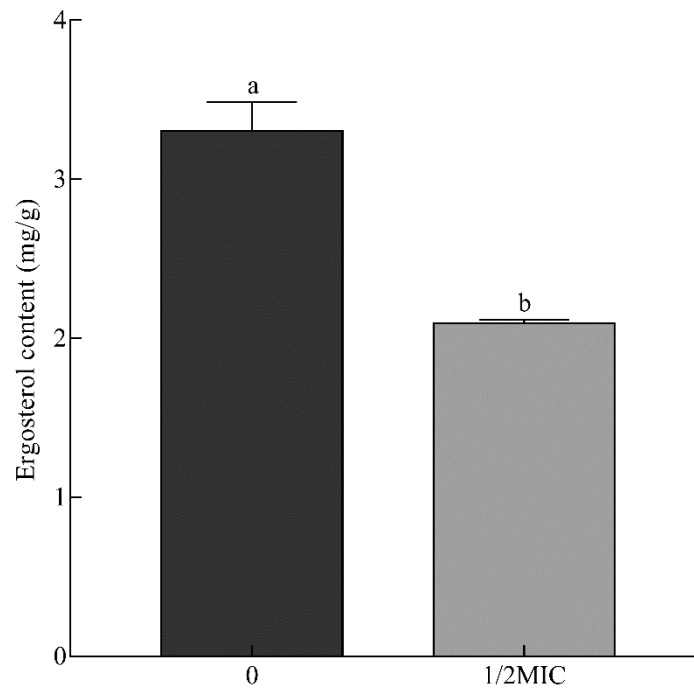

**Figure S1.** Ergosterol content of *A. alternata* in response to different concentrations of citral.

**Table S1.** Statistics of RNA-Seq data from *A. alternata*.

| Sample <sup>a</sup> | Raw reads  | Raw bases     | Clean reads | Clean bases   | Total mapped        | Error rate (%) | Q20(%) | Q30(%) | GC content (%) |
|---------------------|------------|---------------|-------------|---------------|---------------------|----------------|--------|--------|----------------|
| CC_1                | 48,644,700 | 7,345,349,700 | 48,022,338  | 7,124,956,194 | 41,533,625 (86.49%) | 0.0248         | 98.14  | 94.35  | 54.14          |
| CC_2                | 50,827,044 | 7,674,883,644 | 50,225,860  | 7,465,921,432 | 42,975,067 (85.56%) | 0.0247         | 98.17  | 94.43  | 53.88          |
| CC_3                | 49,797,540 | 7,519,428,540 | 49,292,576  | 7,329,237,491 | 42,697,010 (86.62%) | 0.0245         | 98.24  | 94.61  | 53.94          |
| CT_1                | 50,440,054 | 7,616,448,154 | 49,939,542  | 7,443,529,873 | 43,930,630 (87.97%) | 0.0248         | 98.13  | 94.34  | 54.27          |
| CT_2                | 49,206,734 | 7,430,216,834 | 48,683,352  | 7,257,873,079 | 42,851,132 (88.02%) | 0.0244         | 98.27  | 94.68  | 54.23          |
| CT_3                | 52,034,802 | 7,857,255,102 | 51,421,678  | 7,665,472,303 | 46,170,379 (89.79%) | 0.0245         | 98.26  | 94.66  | 54.52          |

<sup>a</sup> CC: control sample with no citral treatment; CT: sample with citral treatment.

**Table S3.** Primer sequences designed for quantitative reverse transcription PCR (qRT-PCR) in *A. alternata*.

| Gene             | Primer   | Sequence (5'→3')      | cDNA length (bp) |
|------------------|----------|-----------------------|------------------|
| <i>β-tubulin</i> | forward  | TCATACTTCGTTGAGTGGAT  | 111              |
|                  | backward | CTGGATGGAGGTGGAGTT    |                  |
| <i>pksI</i>      | forward  | TTCACTTCAAGGCGTAGTC   | 116              |
|                  | backward | CGAAGCTCTTGTCATAAATAC |                  |
| <i>omtI</i>      | forward  | GCCTCAGTTGGACTCATC    | 117              |
|                  | backward | GCAGTTCTCGAAGAAGTGT   |                  |
| <i>aohR</i>      | forward  | TCCTTATCCTGGACGACAT   | 116              |
|                  | backward | GAGGTTGATGACGGCTTC    |                  |
